# Supplementary figures and images for: Immunological corollary of the pulmonary mycobiome in bronchiectasis: the CAMEB study
Source: PubMed Central journal article supplement — Eur Respir J. 2018 Jul 27;52(1):1800766. doi: 10.1183/13993003.00766-2018 (PMC6092680; doi:10.1183/13993003.00766-2018), 2018-07-27

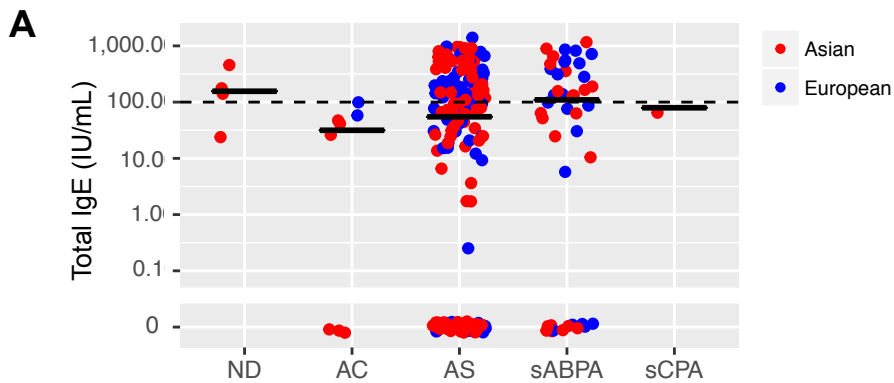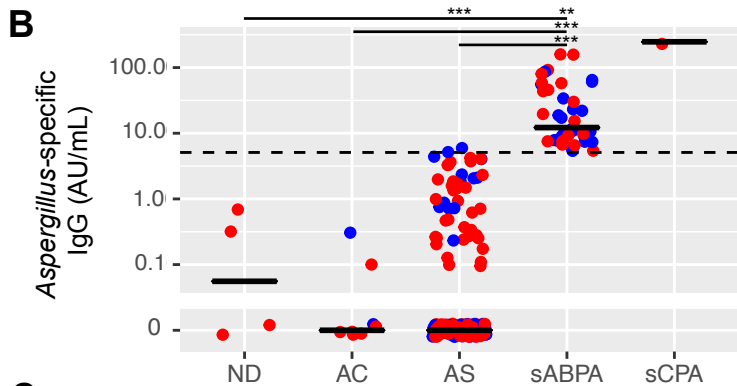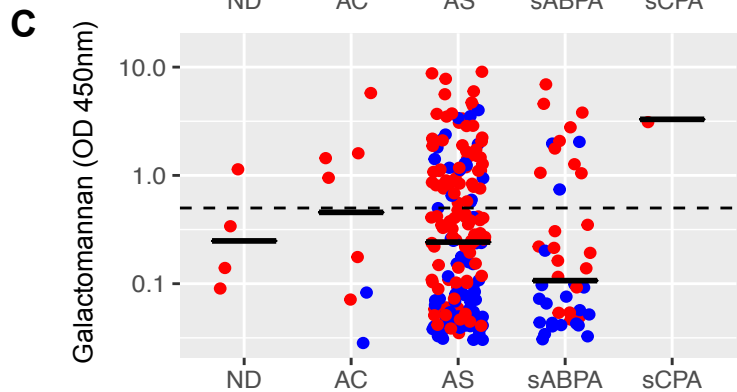

Supplement: ERJ-00766-2018_Figure_E1.pdf [file ERJ-00766-2018_Figure_E1.pdf]

Supplementary Figure E2.

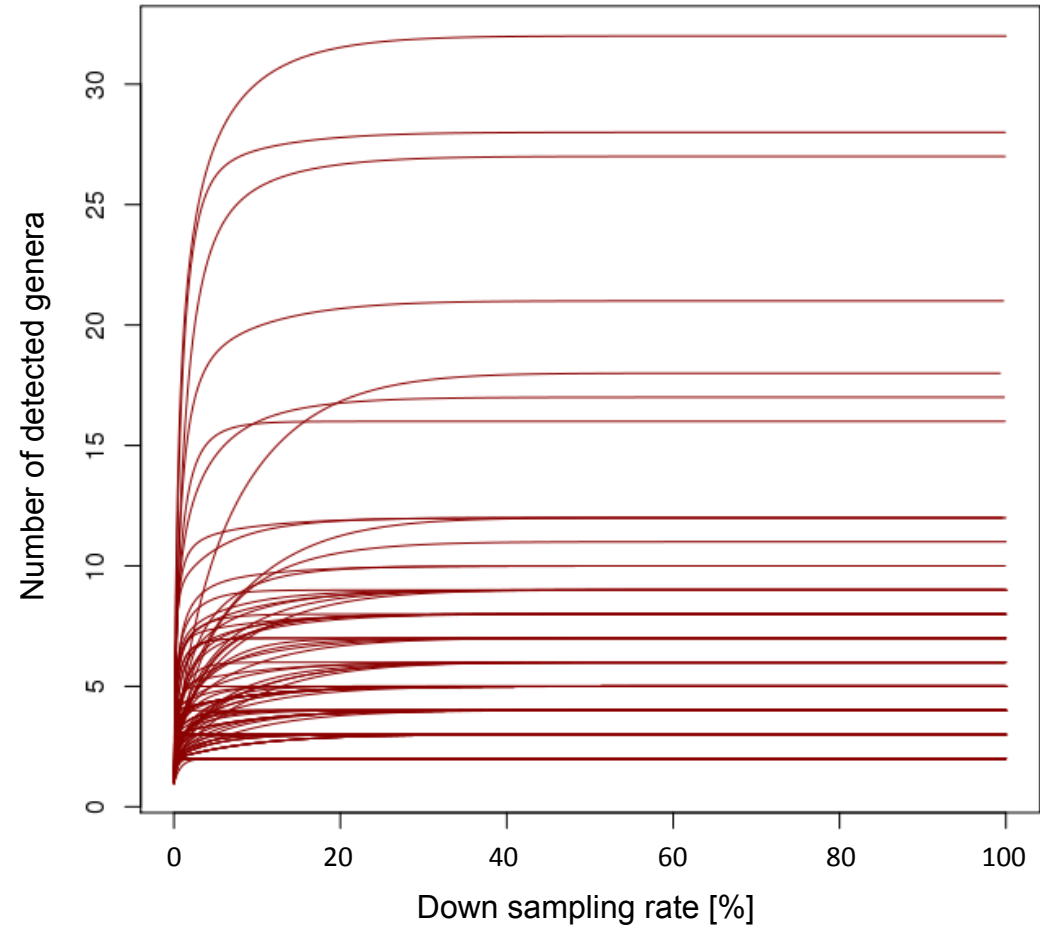

Supplement: ERJ-00766-2018_Figure_E2.pdf [file ERJ-00766-2018_Figure_E2.pdf]

# Supplementary Figure E3.

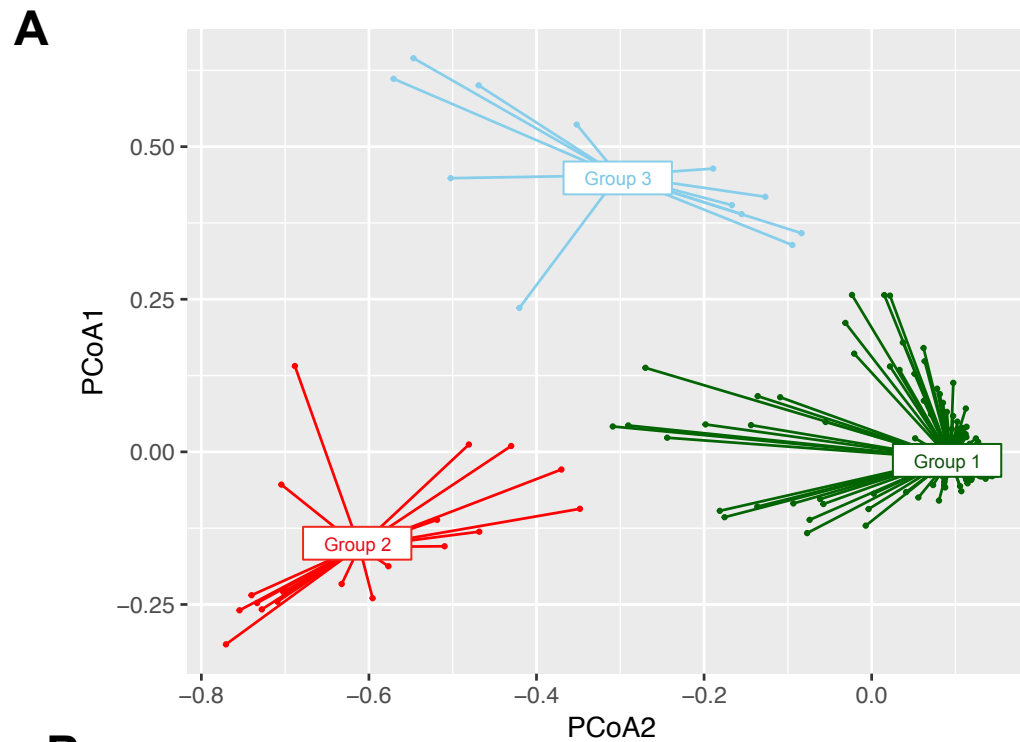

**B**

|                      | Group 1     | Group 2     | Group 3     |
|----------------------|-------------|-------------|-------------|
| <i>Candida</i>       | <b>88.5</b> | 10.8        | 29.3        |
| <i>Aspergillus</i>   | 0.7         | <b>22.6</b> | 1.1         |
| <i>Saccharomyces</i> | 2.2         | 1.3         | <b>60.2</b> |

Supplement: ERJ-00766-2018_Figure_E3.pdf [file ERJ-00766-2018_Figure_E3.pdf]
